# Supplementary material for: High-resolution bacterial 16S rRNA gene profile meta-analysis and biofilm status reveal common colorectal cancer consortia
Source: Springer Nature journal article supplement (doi:10.1038/s41522-017-0040-3), 2017-11-23
Supplement: 41522_2017_40_MOESM6_ESM.pdf [file 41522_2017_40_MOESM6_ESM.pdf]

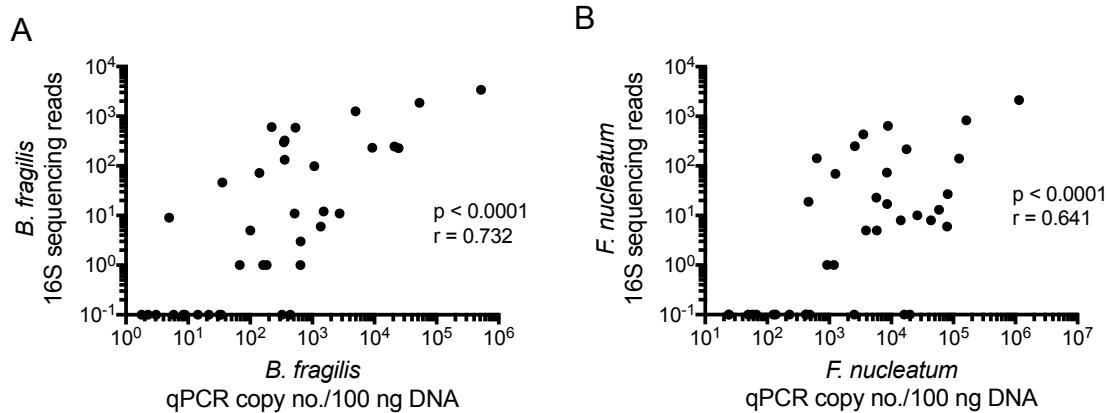

**Fig. S5.** qPCR validation of Resphera Insight. DNA from the MAL1 cohort was analyzed by qPCR for the 16S rRNA gene for **a** *B. fragilis* and **b** *F. nucleatum*. Samples with 0 reads by 16S rRNA gene sequencing were set to a value of 0.1 for visualization; however, statistical analyses were performed on the original raw data. qPCR data significantly correlated with 16S rRNA gene sequencing data from Resphera Insight using Spearman's rank correlation.
